# Supplementary material for: Controlled synthesis of N-doped carbon and TiO2 double-shelled nanospheres with encapsulated multi-layered MoO3 nanosheets as an anode for reversible lithium storage
Source: Royal Society of Chemistry journal article supplement (doi:10.1039/c9dt04877d), 2020-01-01
Supplement: c9dt04877d1.pdf [file c9dt04877d1.pdf]

## Supporting Information

### **Control Synthesis of N-Doped Carbon and TiO<sub>2</sub> Double-Shelled Nanospheres with Encapsulated Multi-Layer MoO<sub>3</sub> Nanosheets as Anode for Reversible Lithium Storage**

Jing Wu, Peilin Zhang, Jinzhe Liu, Chencheng Zhou, Shouzhi Guo, Shuo Li, Yuchen Lei, Kuang Li and Luyang Chen\*

## Supporting Information

Electronic Supplementary Information contains Figures S1-S11 and Table S1

### Table of Content

- Figure S1.** Elemental mapping images of  $\text{MoO}_3@\text{TiO}_2$ .
- Figure S2.** XRD pattern of  $\text{MoO}_3@\text{TiO}_2$ .
- Figure S3.** (a) FESEM image and (b) TEM image  $\text{MoO}_2@\text{TiO}_2$ .
- Figure S4.** XRD pattern of  $\text{MoO}_2@\text{TiO}_2$ .
- Figure S5.** FESEM images of  $\text{MoO}_3@\text{TiO}_2@\text{PDA}$ .
- Figure S6.** FTIR spectrum of  $\text{MoO}_3@\text{TiO}_2@\text{PDA}$  and  $\text{MoO}_3@\text{TiO}_2@\text{Glucose}$ .
- Figure S7.** The size distribution of  $\text{MoO}_3@\text{TiO}_2@\text{NC}$ .
- Figure S8.** (a) FESEM image and (b) size distribution of  $\text{MoO}_3@\text{TiO}_2@\text{C}$ .
- Figure S9.** FESEM images of  $\text{MoO}_3$  nanosheets.
- Figure S10.** Cycling performance of  $\text{MoO}_3@\text{TiO}_2@\text{NC}$ ,  $\text{MoO}_3@\text{TiO}_2@\text{C}$ ,  $\text{MoO}_3@\text{TiO}_2$  and  $\text{MoO}_3$  at a current density of  $1 \text{ A g}^{-1}$ .
- Figure S11.** Electrochemical properties of  $\text{MoO}_3@\text{TiO}_2@\text{NC}//\text{LiNi}_{1/3}\text{Mn}_{1/3}\text{Co}_{1/3}\text{O}_2$  in coin-type full cell: (a) cycling performance at  $0.2 \text{ A g}^{-1}$ , (b) rate performance at various rate of 0.1, 0.2, 0.5, 1, 2, and  $5 \text{ A g}^{-1}$ .
- Table S1** Comparison of specific capacity of  $\text{MoO}_3@\text{TiO}_2@\text{NC}$  sample with some other reported molybdenum oxide-based anode material for LIBs.

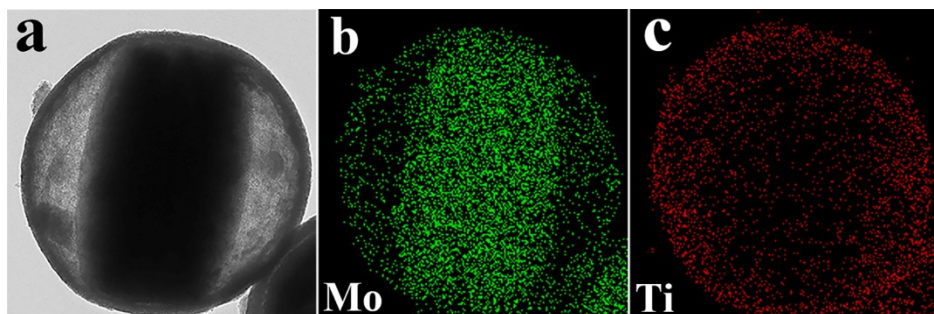

**Figure S1.** Elemental mapping images of MoO<sub>3</sub>@TiO<sub>2</sub>.

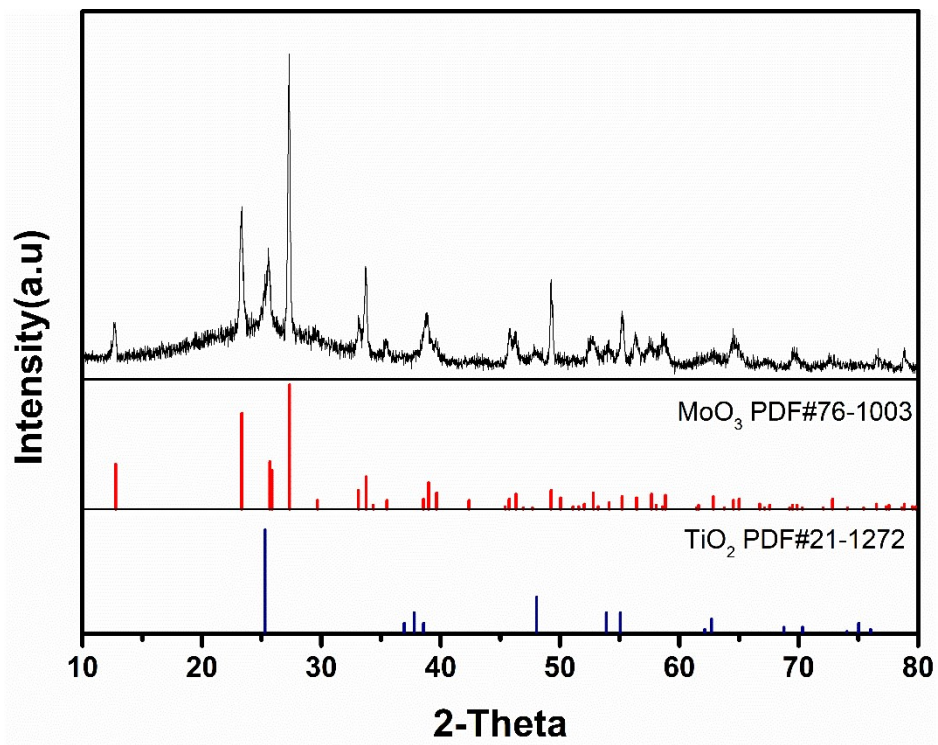

Figure S2. XRD pattern of MoO<sub>3</sub>@TiO<sub>2</sub>.

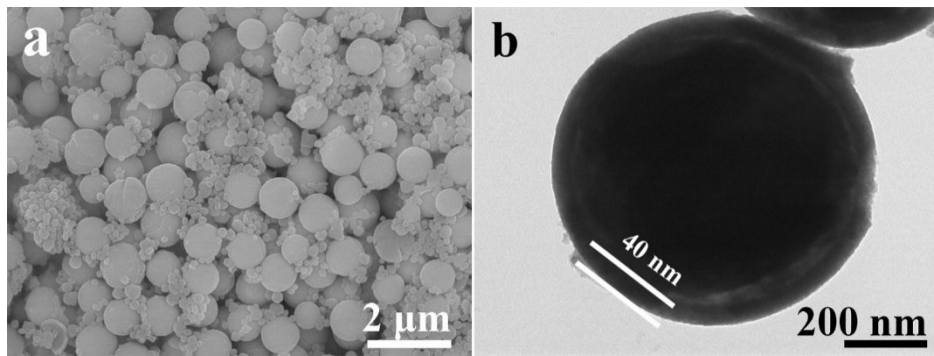

**Figure S3.** (a)FESEM image and (b)TEM image MoO<sub>2</sub>@TiO<sub>2</sub>.

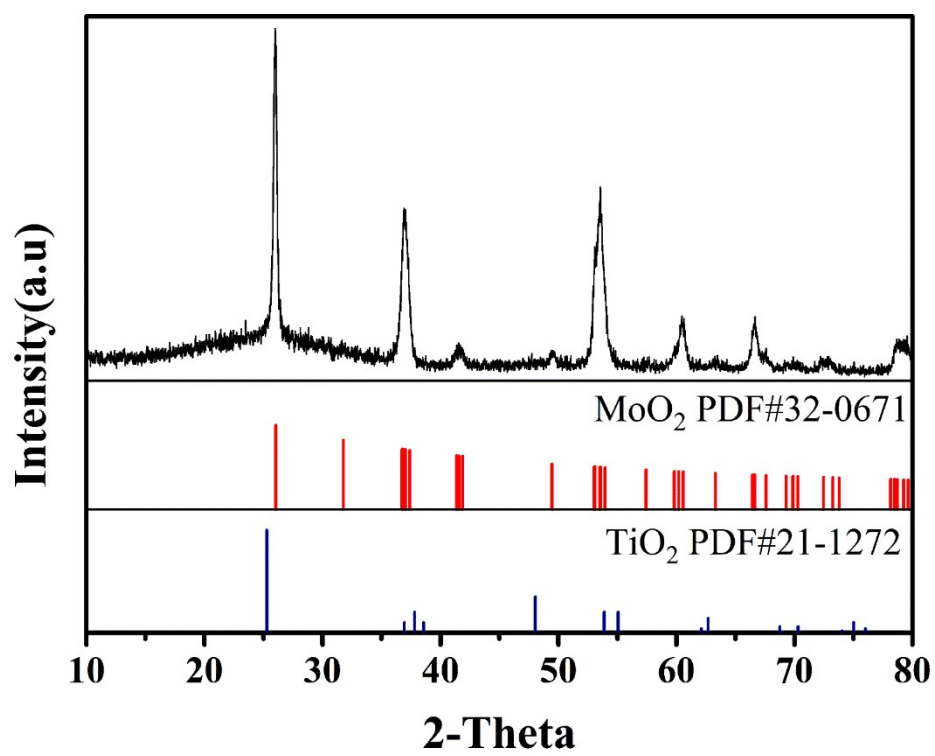

Figure S4. XRD pattern of MoO<sub>2</sub>@TiO<sub>2</sub>.

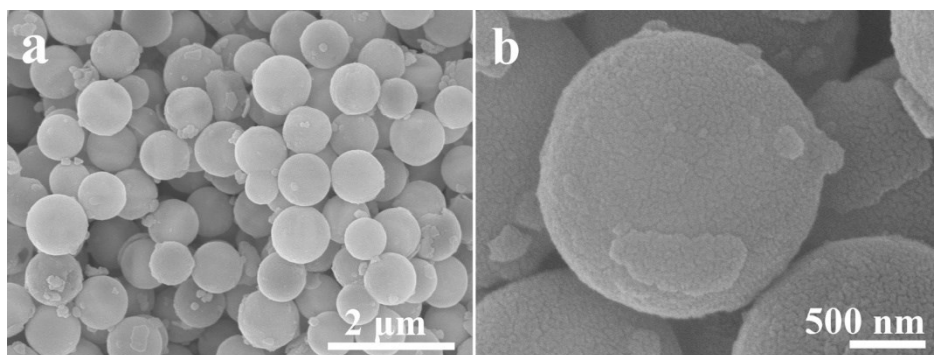

**Figure S5.** FESEM images of  $\text{MoO}_3@\text{TiO}_2@\text{PDA}$ .

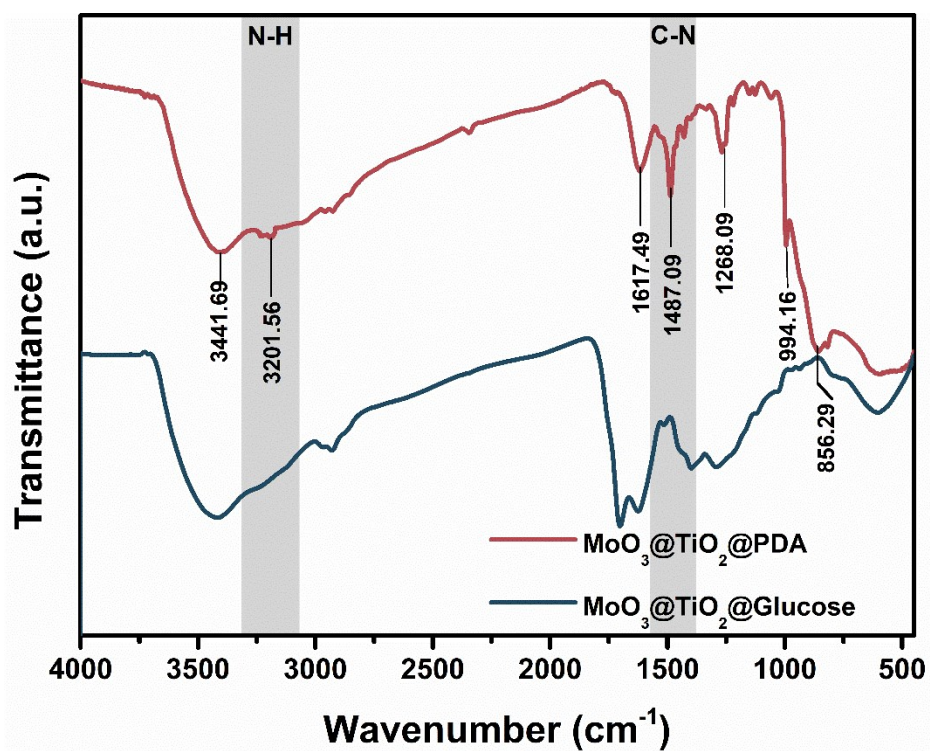

Figure S6. FTIR spectrum of MoO<sub>3</sub>@TiO<sub>2</sub>@PDA and MoO<sub>3</sub>@TiO<sub>2</sub>@Glucose.



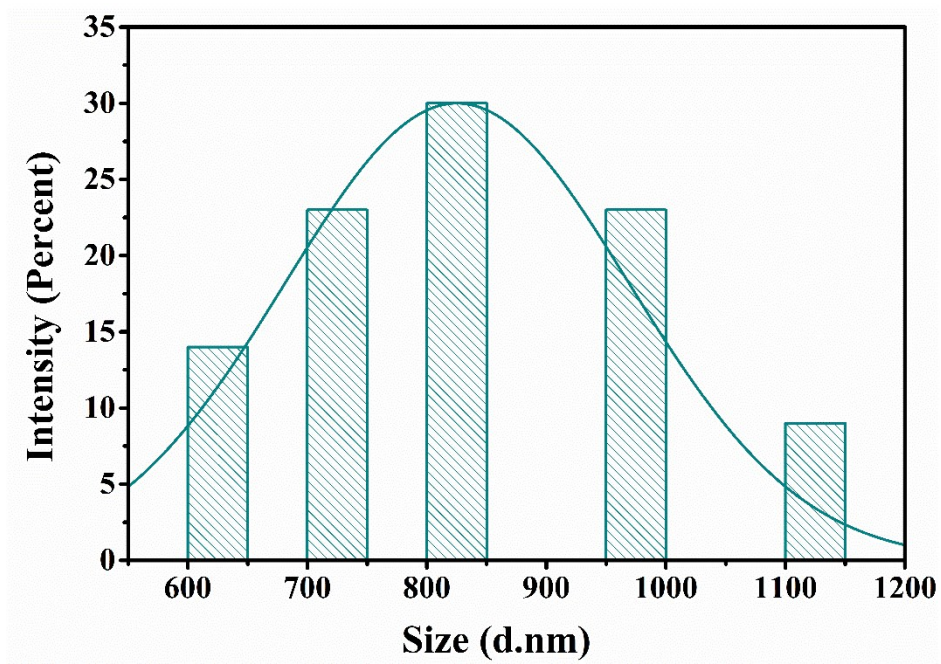

**Figure S7.** The size distribution of MoO<sub>3</sub>@TiO<sub>2</sub>@NC

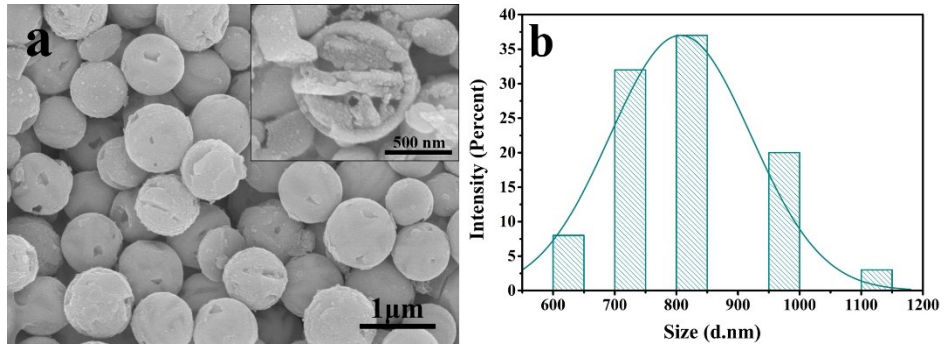

**Figure S8.** (a) FESEM image and (b) size distribution of  $\text{MoO}_3@\text{TiO}_2@\text{C}$ .

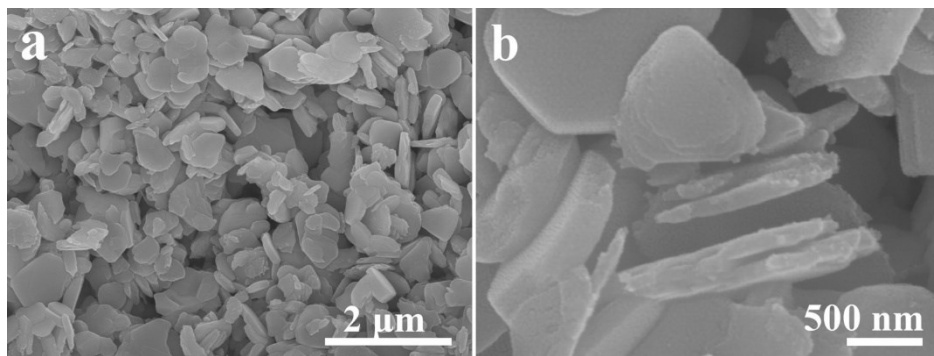

**Figure S9.** FESEM images of MoO<sub>3</sub> nanosheets.

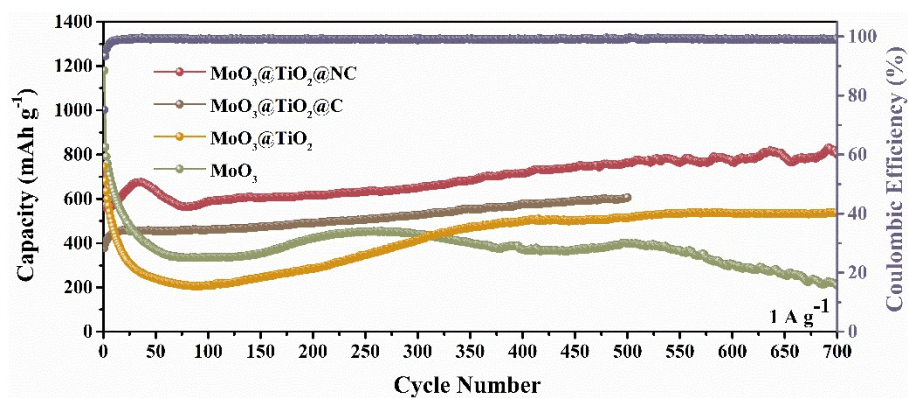

**Figure S10.** Cycling performance of MoO<sub>3</sub>@TiO<sub>2</sub>@NC, MoO<sub>3</sub>@TiO<sub>2</sub>@C, MoO<sub>3</sub>@TiO<sub>2</sub> and MoO<sub>3</sub> at a current density of 1 A g<sup>-1</sup>.

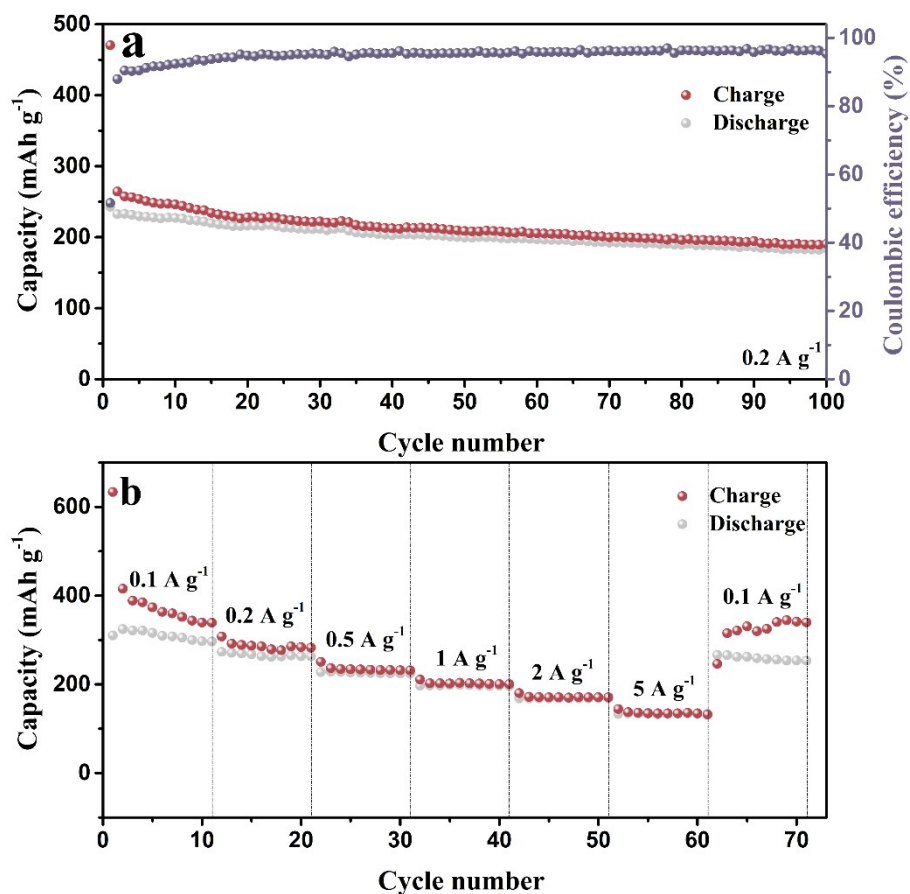

**Figure S11.** Electrochemical properties of MoO<sub>3</sub>@TiO<sub>2</sub>@NC//LiNi<sub>1/3</sub>Mn<sub>1/3</sub>Co<sub>1/3</sub>O<sub>2</sub> in coin-type full cell: (a) cycling performance at 0.2 A g<sup>-1</sup>, (b) rate performance at various rate of 0.1, 0.2, 0.5, 1, 2, and 5 A g<sup>-1</sup>.

**Table S1** Comparison of specific capacity of MoO<sub>3</sub>@TiO<sub>2</sub>@NC sample with some other reported molybdenum oxide-based anode material for LIBs.

| Anode material                                         | Current density (A g <sup>-1</sup> ) | Cycle number | Reversible capacity (mAh g <sup>-1</sup> ) | Reference        |
|--------------------------------------------------------|--------------------------------------|--------------|--------------------------------------------|------------------|
| <b>MoO<sub>3</sub>@TiO<sub>2</sub>@NC</b>              | <b>0.2</b>                           | <b>200</b>   | <b>979.6</b>                               | <b>This work</b> |
| <b>MoO<sub>3</sub>@TiO<sub>2</sub>@NC</b>              | <b>1</b>                             | <b>700</b>   | <b>800.3</b>                               | <b>This work</b> |
| MoO <sub>2</sub> @C octahedrons                        | 1                                    | 850          | 444                                        | [1]              |
| 3D-MoO <sub>x</sub> @CN-700                            | 1                                    | 1000         | 431                                        | [2]              |
| C/TiO <sub>2</sub> /MoO <sub>3</sub> /MoS <sub>2</sub> | 0.1                                  | 100          | 540                                        | [3]              |
| MoO <sub>3</sub> @C nanofibers                         | 0.5                                  | 100          | 623                                        | [4]              |
| MoO <sub>3</sub> /CNT                                  | 0.2                                  | 100          | 421                                        | [5]              |
| MoO <sub>3-x</sub> nanobelts                           | 1                                    | 200          | 400                                        | [6]              |
| MoO <sub>3</sub> /V <sub>2</sub> O <sub>5</sub> /C     | 0.2                                  | 200          | 737.6                                      | [7]              |
| TiO <sub>2</sub> /MoO <sub>3</sub> nanowire            | 0.25                                 | 200          | 381                                        | [8]              |
| TiO <sub>2</sub> /MoO <sub>3</sub> @CNFs               | 1                                    | 1000         | 561                                        | [9]              |
| MoO <sub>3</sub> /rGO                                  | 0.5                                  | 100          | 568                                        | [10]             |
| MoO <sub>3</sub> / carbon nanofiber                    | 0.2                                  | 100          | 795.8                                      | [11]             |

- 1 H.B. Wu, B.Y. Xia, L. Yu, X.Y. Yu, X.W. Lou, Nat. Commun. 6 (2015) 6512.
- 2 Z. Li, C. Wang, X.Z. Chen, X.X. Wang, X.Y. Li, Y. Yamauchi, X.J. Xu, J. Chem. Eng. J. 381 (2020).
- 3 H. Zhou, X. Xia, P. Lv, J. Zhang, X. Hou, M. Zhao, K. Ao, D. Wang, K. Lu, H. Qiao, M. Zimmiewska, Q. Wei, ChemSusChem 11(23) (2018) 4060-4070.
- 4 X. Li, J. Xu, L. Mei, Z. Zhang, C. Cui, H. Liu, J. Ma, S. Dou, J. Mater. Chem. A 3(7) (2015) 3257-3260.
- 5 J. Ni, G. Wang, J. Yang, D. Gao, J. Chen, L. Gao, Y. Li, J. Power Sources 247 (2014) 90-94.
- 6 Z. Sun, C. Yang, G. Liu, H. Lu, R. Zhang, L. Wang, H. Wang, Electrochim.Acta239(2017) 16-24.
- 7 Z. Zhang, X. Chen, G. Zhang, C. Feng, J. Nanosci. Nanotechnol. 20(5) (2020) 2911-2916.
- 8 C. Wang, L. Wu, H. Wang, W. Zuo, Y. Li, J. Liu, Adv. Funct. Mater. 25(23) (2015) 3524-3533.
- 9 S. Xie, T. Yao, J. Wang, H. Alsulami, M.A. Kutbi, H. Wang, ChemistrySelect 5(11) (2020) 3225-3233.
- 10 N. Naresh, P. Jena, N. Satyanarayana, J. Alloys Compd. 810 (2019) 151920.
- 11 L. Xiu, L. Yuan, Y. Xiaodong, L. Jin-Le, Y. Yunhua, Y. Xiaoping, Mater. Chem. Front. 3(1) (2019) 120-6.
